# Supplementary material for: Physicochemical Studies on the Interaction between Sodium Dodecyl Sulfate and Methylene Blue in Methanol-Water Mixed Solvent Media
Source: Hindawi journal article supplement (doi:10.1155/2020/5292385), 2020-12-03
Supplement: f1 [file 5292385.f1.docx]

**Supporting Information**

**Physicochemical studies on the interaction between sodium dodecyl sulfate and methylene-blue in methanol-water mixed solvent media**

Pawan Shah, Nilam Jha, Ajaya Bhattarai*

Department of Chemistry, M.M.A.M.C., Tribhuvan University, Biratnagar, Nepal

* Corresponding author: bkajaya@yahoo.com

(a)

(b)

(c)

Fig. S1. Tensiometric profiles of SDS without methylene blue (о) and with methylene blue (□) in (a) 0.1, (b) 0.2 and (c) 0.3 volume fraction of methanol in aqueous medium at 298.15 K.

(a)

(b)

(c)

Fig. S2. Plot of Variation of with (a) Viscosity (ηo) (b) Gordon parameter (G) and (c) Reichardt's parameter (ET (30)).
